# Supplementary material for: Shear thickening in suspensions of particles with dynamic brush layers
Source: Royal Society of Chemistry journal article supplement (doi:10.1039/d4sm00624k), 2024-01-01
Supplement: d4sm00624k1.pdf [file d4sm00624k1.pdf]

# Electronic supplementary information: Shear thickening in suspensions of particles with dynamic brush layers

Hojin Kim<sup>\*a,b</sup>, Michael van der Naald<sup>a,c</sup>, Finn A. Braaten<sup>a,c</sup>,  
Thomas A. Witten<sup>a,c</sup>, Stuart J. Rowan<sup>b,d</sup>, and Heinrich M. Jaeger<sup>a,c</sup>

<sup>a</sup>James Franck Institute, The University of Chicago, Chicago, Illinois 60637, USA

<sup>b</sup>Pritzker School of Molecular Engineering, The University of Chicago, Chicago, Illinois 60637, USA

<sup>c</sup>Department of Physics, The University of Chicago, Chicago, Illinois 60637, USA

<sup>d</sup>Department of Chemistry, The University of Chicago, Chicago, Illinois 60637, USA

\* hojinkim718@gmail.com

## S1. Particle synthesis and characterization

Silica particles were purchased from Fiber Optic Center (New Bedford, MA) with diameters 300 nm, 500 nm, 1  $\mu\text{m}$ , and 2  $\mu\text{m}$ . The particle surface was functionalized by the procedure reported previously[1]. First, 10 g of silica particles were added to 400 mL of toluene. The suspension was sonicated for 1 hr and stirred for another 30 min to homogenize the suspension. Then 3-mercaptopropyl trimethoxysilane (MPTMS) was added to the solution. The concentration of MPTMS was kept 10 MPTMS molecules per  $\text{nm}^2$  surface area of the added silica particles. The solution was then heated to reflux and left for 24 hr. Toluene from the final solution was completely removed using a rotary evaporator. The particle powder was washed with ethanol three times by repeating sonication and centrifugation. The final particles were left under vacuum for 24 hr.

The surface density of thiol functional groups was estimated using nuclear magnetic resonance (NMR) studies[1] using 1,3,5-trioxane as an internal standard. First, 20 mg of the silica particles was added to 0.5 M NaOD/D<sub>2</sub>O solution. The solution was stirred at 85 °C overnight to fully dissolve the silica particle. The thiol density of the particle surface  $\rho_{\text{SH}}$  was estimated by NMR. The peak intensity of the (ONa)3SiCH<sub>2</sub>CH<sub>2</sub>CH<sub>2</sub>SH ( $\delta = 2.43$  ppm) was compared to that of the internal standard (Table S1). The total number of the surface thiol  $N_{\text{SH}}$  at the particle with diameter  $d$  in a suspension with packing fraction  $\phi$  is estimated by

$$N_{\text{SH}} = \phi \frac{\pi d^2}{\pi d^3/6} \rho_{\text{SH}},$$

and the total number of the Michael-acceptor group is estimated by

$$N_{\text{MA}} = (1 - \phi) \rho_{\text{PPG}} N_{\text{A}} n_{\text{MA}} / M_{\text{PPG}}$$

with the Avogadro constant  $N_{\text{A}}$ , the density ( $\rho_{\text{PPG}} \approx 1$  g/ml) and molecular weight ( $M_{\text{PPG}} = 5300$  g/mol) of (N-BCAm)-endcapped poly(propylene glycol), and the number of Michael-acceptor group  $n_{\text{MA}} = 2$ . The

**Table S1:** Estimated thiol density of the particle surface.

| diameter                              | 340 nm                 | 620 nm                 | 870 nm                 | 1210 nm                | 1930 nm                |
|---------------------------------------|------------------------|------------------------|------------------------|------------------------|------------------------|
| Thiol density of the particle surface | 1.09 SH/ $\text{nm}^2$ | 2.15 SH/ $\text{nm}^2$ | 2.19 SH/ $\text{nm}^2$ | 1.20 SH/ $\text{nm}^2$ | 1.31 SH/ $\text{nm}^2$ |

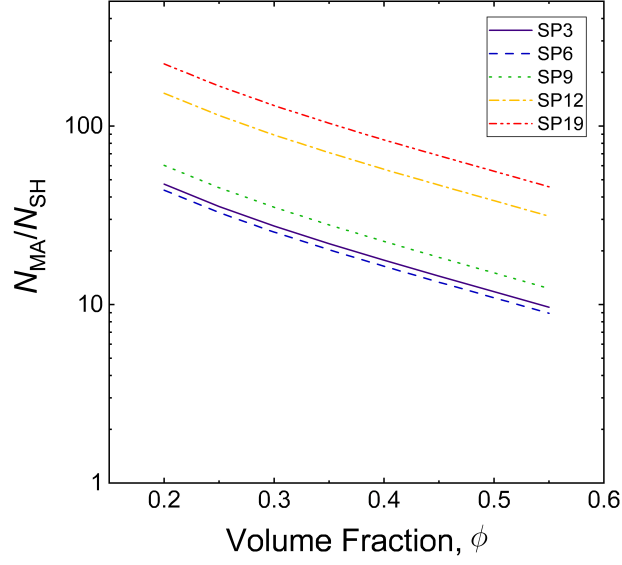

**Figure S1:** Stoichiometric ratio of Michael-acceptor to thiol in suspensions of different particle sizes is plotted over the particle volume fraction range studied in this study.

**Table S2:** Parameters from a power-law relation,  $\eta = A(1 - \phi/\phi_J)^{-n}$ .

| diameter | $A$  | $n$  | $\phi_J$ |
|----------|------|------|----------|
| 620 nm   | 0.79 | 1.79 | 0.48     |
| 1210 nm  | 0.96 | 1.69 | 0.51     |
| 1930 nm  | 0.74 | 1.73 | 0.54     |

ratio of Michael-acceptor to thiol  $N_{MA}/N_{SH}$  in suspensions with various particle volume fractions is plotted in Figure S1.

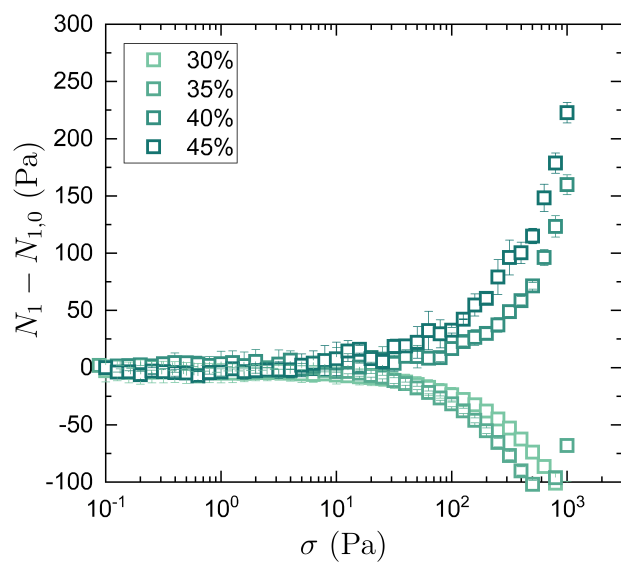

**Figure S2:** First normal stress difference  $N_1$  for particles ( $d = 620$  nm, SP6).

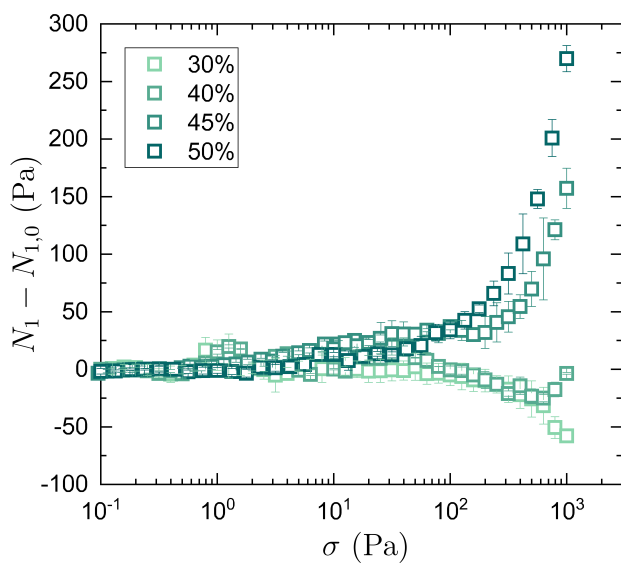

**Figure S3:** First normal stress difference  $N_1$  for particles ( $d = 1210$  nm, SP12).

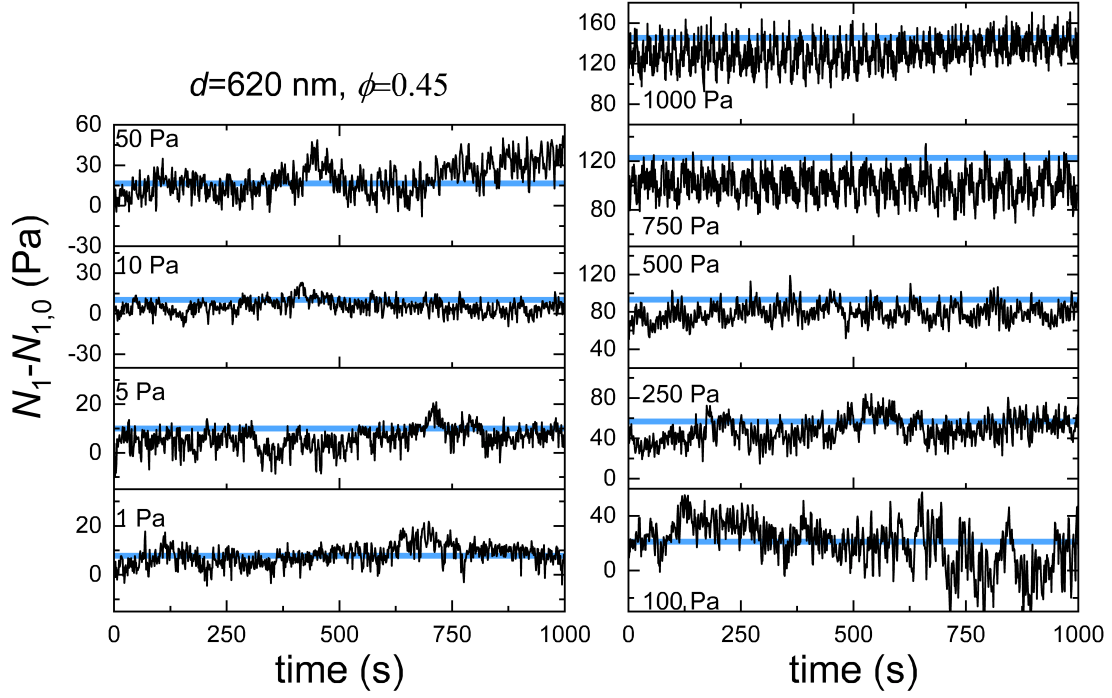

**Figure S4:** Time-dependent measurement of the first normal stress difference  $N_1$  for the suspension of particles with diameter  $d = 620$  nm at  $\phi = 0.45$ . Measurements were performed at each shear stress after the consistent preshear and relaxation steps. Blue lines indicate the  $N_1$  at each shear stress from the stress-sweep measurement (30 s per each stress).

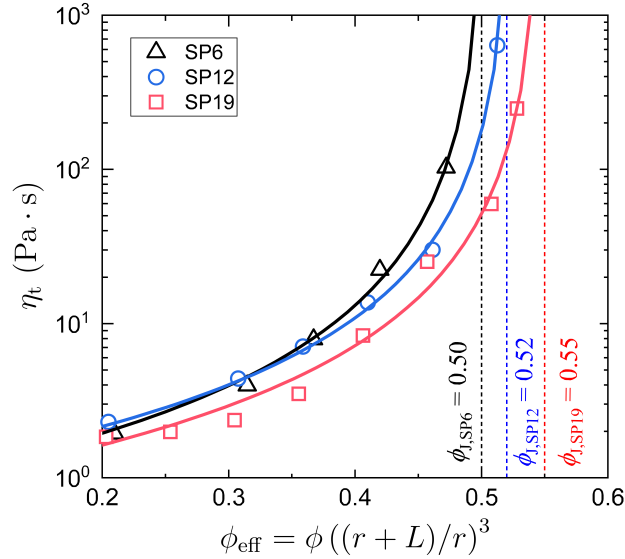

**Figure S5:** Viscosity  $\eta_t$  at the thickened state versus the effective volume fraction  $\phi_{\text{eff}} = \phi(1 + 2L/d)^3$  for SP6 (black), SP12 (blue), and SP19 (red). The thickness of the brush layer is set to half of the contour length  $L_c \approx 10$  nm. Lines are least-squares fits to  $\eta = A(1 - \phi_{\text{eff}}/\phi_J)^{-n}$ . The estimated jamming volume fraction  $\phi_J$  is  $\phi_{J,\text{SP6}} = 0.50$ ,  $\phi_{J,\text{SP12}} = 0.52$ , and  $\phi_{J,\text{SP19}} = 0.55$ .

## References

- S1 Carina IC Crucho, Carlos Baleizao, and Jose Paulo S Farinha. Functional group coverage and conversion quantification in nanostructured silica by  $^1\text{H}$  NMR. *Analytical chemistry*, 89(1):681–687, 2017.
